# Supplementary material
Source: PubMed Central journal article supplement (PMC1820800)
Supplement: bj4010505add2.pdf [file bj4010505add2.pdf]

## Supplemental figure.2

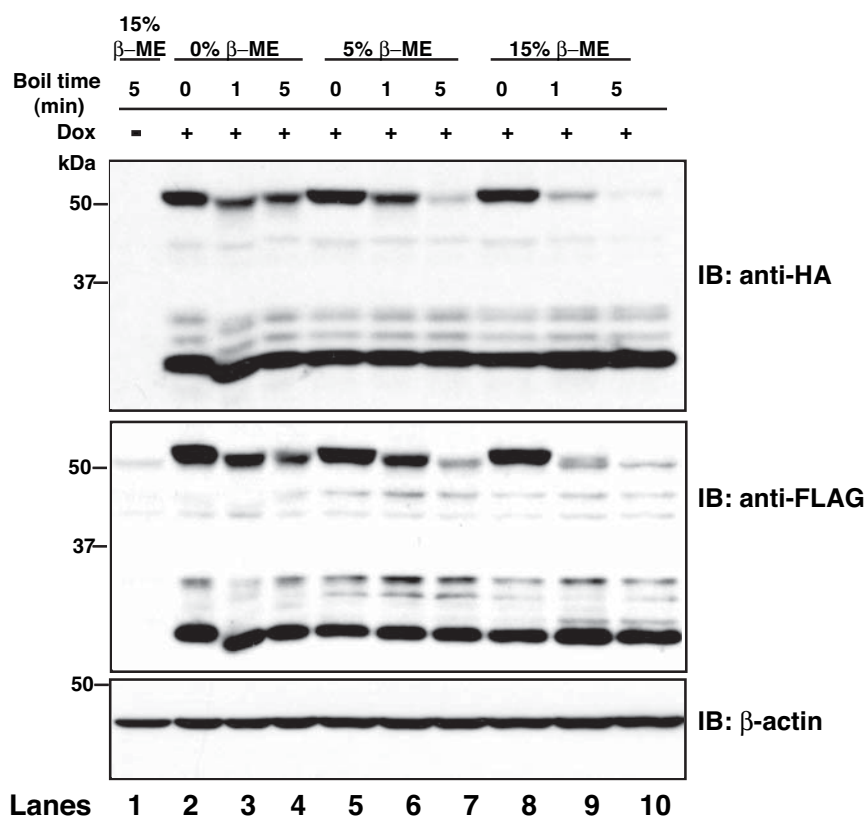

**Supplemental Figure 2: Combined effects of temperature and  $\beta$ -mercaptoethanol ( $\beta$ -ME) on SLC41A2.** SDS-PAGE (10%) and immunoblot analysis of FLAG and HA tagged SLC41A2 (FLAG at N-terminus and HA at the C-terminus) in absence/presence of  $\beta$ -ME. Lane 1 was loaded with lysate from uninduced cells with 15%  $\beta$ -ME and boiled for 5 min. Samples from lane 2 onwards were induced with doxycycline (1  $\mu$ g/ml) and were either kept on ice or boiled at 95°C for 1 or 5 min in presence of 5% or 15 %  $\beta$ -ME or without  $\beta$ -ME as indicated in the figure. The blot was first probed with anti-HA antibody, stripped and re-probed with anti-FLAG antibody, re-stripped and finally re-probed with  $\beta$ -actin antibody.
